# Supplementary material for: Statistical analysis of hydrological response in urbanising catchments based on adaptive sampling using inter-amount times
Source: Copernicus journal article supplement (doi:10.5194/hess-21-1991-2017), 2017-04-13
Supplement: Supplementary file 1 [file Supplement titles_Characterising hydrological response in urban watersheds based on inter-amount time distributions.pdf › Supplement/Supplement titles_Characterising hydrological response in urban watersheds based on inter-amount time distributions.pdf]

Supplements to “Characterising hydrological response in urban watersheds based on inter-amount time distributions” by ten Veldhuis and Schleiss

- Supplement A1: Histograms\_Amounts  
Histograms of flow time series for the 17 basins in the Charlotte catchment, for 24 hour scale.
- Supplement A2: Histograms\_IATs: Histograms of time series of inter-amount times for the 17 basins in the Charlotte catchment, for 24 hour scale.
- Supplement B1: Histograms\_Differences\_Amounts: histograms of first-order differences in flows, at 24 hour sampling scale, for the 17 basins in the Charlotte catchment
- Supplement B2: Histograms\_Differences\_IATs: histograms of first-order differences in inter-amount times, at 24 hour sampling scale, for the 17 basins in the Charlotte catchment
- Supplement C: Quantiles\_Amounts\_and\_IATs: Quantile plots of flows (a) and inter-amount times (b) for the 17 basins in the Charlotte catchment. The bold black line denotes the mean values. The dotted black line shows median values. The central part of boxplots represents the 25-75 percentile range, upper and lower whiskers 10-90 percentile range, crosses the 1-99 percentile range.
