# Supplementary material for: Statistical analysis of hydrological response in urbanising catchments based on adaptive sampling using inter-amount times
Source: Copernicus journal article supplement (doi:10.5194/hess-21-1991-2017), 2017-04-13
Supplement: Supplementary file [file hess-21-1991-2017-supplement-title-page.pdf › hess-21-1991-2017-supplement-title-page.pdf]

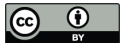

## *Supplement of*

# **Statistical analysis of hydrological response in urbanising catchments based on adaptive sampling using inter-amount times**

**Marie-Claire ten Veldhuis and Marc Schleiss**

*Correspondence to:* Marie-Claire ten Veldhuis (j.a.e.tenveldhuis@tudelft.nl)

- hess-21-1991-2017-supplement-title-page.pdf
- Supplement
  - Supp\_A1\_Histograms\_Amounts
    - \* Histogram\_Amounts\_0214627970.png
    - \* Histogram\_Amounts\_02146300.png
    - \* Histogram\_Amounts\_02146315.png
    - \* Histogram\_Amounts\_02146348.png
    - \* Histogram\_Amounts\_02146409.png
    - \* Histogram\_Amounts\_0214642825.png
    - \* Histogram\_Amounts\_0214645022.png
    - \* Histogram\_Amounts\_02146507.png
    - \* Histogram\_Amounts\_02146530.png
    - \* Histogram\_Amounts\_0214655255.png
    - \* Histogram\_Amounts\_02146562.png
    - \* Histogram\_Amounts\_0214657975.png
    - \* Histogram\_Amounts\_02146600.png
    - \* Histogram\_Amounts\_02146700.png
    - \* Histogram\_Amounts\_02146750.png
    - \* Histogram\_Amounts\_0214678175.png
    - \* Histogram\_Amounts\_0214685800.png
  - Supp\_A2\_Histograms\_IATs
    - \* Histogram\_IATs\_0214627970.png
    - \* Histogram\_IATs\_02146300.png
    - \* Histogram\_IATs\_02146315.png
    - \* Histogram\_IATs\_02146348.png
    - \* Histogram\_IATs\_02146409.png
    - \* Histogram\_IATs\_0214642825.png

- \* Histogram\_IATs\_0214645022.png
- \* Histogram\_IATs\_02146507.png
- \* Histogram\_IATs\_02146530.png
- \* Histogram\_IATs\_0214655255.png
- \* Histogram\_IATs\_02146562.png
- \* Histogram\_IATs\_0214657975.png
- \* Histogram\_IATs\_02146600.png
- \* Histogram\_IATs\_02146700.png
- \* Histogram\_IATs\_02146750.png
- \* Histogram\_IATs\_0214678175.png
- \* Histogram\_IATs\_0214685800.png
- Supp\_B1\_Histograms\_Differences\_Amounts
  - \* Histogram\_Differences\_Amounts\_0214627970.png
  - \* Histogram\_Differences\_Amounts\_02146300.png
  - \* Histogram\_Differences\_Amounts\_02146315.png
  - \* Histogram\_Differences\_Amounts\_02146348.png
  - \* Histogram\_Differences\_Amounts\_02146409.png
  - \* Histogram\_Differences\_Amounts\_0214642825.png
  - \* Histogram\_Differences\_Amounts\_0214645022.png
  - \* Histogram\_Differences\_Amounts\_02146507.png
  - \* Histogram\_Differences\_Amounts\_02146530.png
  - \* Histogram\_Differences\_Amounts\_0214655255.png
  - \* Histogram\_Differences\_Amounts\_02146562.png
  - \* Histogram\_Differences\_Amounts\_0214657975.png
  - \* Histogram\_Differences\_Amounts\_02146600.png
  - \* Histogram\_Differences\_Amounts\_02146700.png
  - \* Histogram\_Differences\_Amounts\_02146750.png
  - \* Histogram\_Differences\_Amounts\_0214678175.png
  - \* Histogram\_Differences\_Amounts\_0214685800.png
- Supp\_B2\_Histograms\_Differences\_IATs
  - \* Histogram\_Differences\_IATs\_0214627970.png
  - \* Histogram\_Differences\_IATs\_02146300.png
  - \* Histogram\_Differences\_IATs\_02146315.png
  - \* Histogram\_Differences\_IATs\_02146348.png
  - \* Histogram\_Differences\_IATs\_02146409.png
  - \* Histogram\_Differences\_IATs\_0214642825.png
  - \* Histogram\_Differences\_IATs\_0214645022.png
  - \* Histogram\_Differences\_IATs\_02146507.png
  - \* Histogram\_Differences\_IATs\_02146530.png
  - \* Histogram\_Differences\_IATs\_0214655255.png
  - \* Histogram\_Differences\_IATs\_02146562.png
  - \* Histogram\_Differences\_IATs\_0214657975.png
  - \* Histogram\_Differences\_IATs\_02146600.png
  - \* Histogram\_Differences\_IATs\_02146700.png
  - \* Histogram\_Differences\_IATs\_02146750.png
  - \* Histogram\_Differences\_IATs\_0214678175.png
  - \* Histogram\_Differences\_IATs\_0214685800.png

- Supp\_C\_Quantiles\_Amounts\_and\_IATs
  - \* Quantiles\_0214627970.png
  - \* Quantiles\_02146300.png
  - \* Quantiles\_02146315.png
  - \* Quantiles\_02146348.png
  - \* Quantiles\_02146409.png
  - \* Quantiles\_0214645022.png
  - \* Quantiles\_02146507.png
  - \* Quantiles\_02146530.png
  - \* Quantiles\_0214655255.png
  - \* Quantiles\_0214657975.png
  - \* Quantiles\_02146600.png
  - \* Quantiles\_02146700.png
  - \* Quantiles\_02146750.png
  - \* Quantiles\_0214678175.png
  - \* Quantiles\_0214685800.png
- Supplement titles\_Characterising hydrological response in urban watersheds based on inter-amount time distributions.pdf

The copyright of individual parts of the supplement might differ from the CC-BY 3.0 licence.
